# Supplementary material for: Highly reversible Li metal anode using a binary alloy interface
Source: Royal Society of Chemistry journal article supplement (doi:10.1039/d2cc05051j), 2022-01-01
Supplement: d2cc05051j1.pdf [file d2cc05051j1.pdf]

## Supporting Information

# Highly Reversible Li Metal Anode Using a Binary Alloy Interface

Jiahe Chen<sup>‡a,b</sup>, Zejun Sun<sup>‡a</sup>, Zhendong Li<sup>a</sup>, Jun Liu<sup>\*b</sup>, Xiayin Yao<sup>\*a</sup>, Zhe Peng<sup>\*a</sup>

<sup>a</sup>Ningbo Institute of Materials Technology and Engineering, Chinese Academy of Sciences, Ningbo, 315201, China.

<sup>b</sup>Guangdong Provincial Key Laboratory of Advanced Energy Storage Materials, School of Materials Science and Engineering, South China University of Technology, Guangzhou, 510641, China.

<sup>‡</sup>These authors contributed equally to this work.

To whom correspondence should be addressed: msjliu@scut.edu.cn; yaoxy@nimte.ac.cn; pengzhe@nimte.ac.cn

## Experimental Section

Electrode preparations: Silver bis(trifluoromethanesulfonyl)imide (AgTFSI), antimony trifluoride (SbF<sub>3</sub>) and ethylene glycol dimethyl ether (DME) were purchased from Aladdin. Zinc bis(trifluoromethanesulfonyl)imide (Zn(TFSI)<sub>2</sub>) was purchased from Energy Chemical Corporation. Battery grade Lithium bis(trifluoromethanesulphonyl)imide (LiTFSI), ethylene carbonate (EC), diethyl carbonate (DEC) and fluoroethylene carbonate (FEC) were purchased from Sigma-Aldrich Co, LLC and used as received. To prepare the Ag<sup>+</sup> precursor solution, 0.1 mol L<sup>-1</sup> (M) AgTFSI was dissolve in DME solution and stored in an Ar filled glove box in dark environment. The Li-Ag electrodes were fabricated by simple replacement reaction in the above-mentioned glove box. 100 μL AgTFSI-DME precursor solution was evenly dropped on the surface of Li foil (thickness: 50 μm, diameter: 16 mm, China Energy Lithium Co., Ltd). After evaporation of the residual DME solution, a dark surface consisting of Ag nanostructures was obtained on the Li surface, corresponding to the Li-Ag electrode. The Li-Ag-Zn electrodes were fabricated by *in-situ* electro-reduction of Zn<sup>2+</sup> on the Li-Ag electrodes. A baseline electrolyte consists of 1.0 M LiTFSI in EC:DEC (1:1 by vol.) with 5 vol% FEC was prepared first, then the selected amount of Zn(TFSI)<sub>2</sub> was added into the baseline electrolyte to prepare the Zn<sup>2+</sup> containing electrolyte. The Li-Ag-Zn electrode can be *in-situ* formed during the cycling of the battery using the Zn<sup>2+</sup> containing electrolyte. By replacing the Ag<sup>+</sup> precursor solution by a Sb<sup>3+</sup> precursor solution (0.1 M SbF<sub>3</sub> in DME), the Li-Sb and Li-Sb-Zn electrodes were prepared by the same ways as for the Li-Ag and Li-Ag-Zn electrodes.

Electrochemical tests: CR2032 coin cells were used for cell assembly, and Celgard separators containing 70  $\mu\text{L}$  electrolyte were placed in the cells. Galvanostatic deposition/stripping experiments were conducted on the symmetric cells. Thick  $\text{LiFePO}_4$  cathodes with a high areal capacity of  $2.5 \text{ mAh cm}^{-2}$  were adopted to fabricate the  $\text{Li} \parallel \text{LiFePO}_4$  full cells. All the full cells were pre-cycled for five cycles at charge/discharge rates of 0.1C/0.1C in the voltage window of 2.5-4.4 V vs.  $\text{Li/Li}^+$ , followed by cycling at 0.5C/0.5C. All the electrochemical cycling test were performed on a LAND system (CT2001A) at 30  $^{\circ}\text{C}$ .

Materials characterization: The crystalline phase was probed by XRD with a Bruker D8 ADVANCE diffractometer using  $\text{Cu K}\alpha$  radiation ( $1.5406 \text{ \AA}$ ). Before XRD characterization, the electrodes were wrapped by polyimide film to avoid the contact with ambient environment. The surface chemistry of the samples was analyzed by a PHI 3056 XPS system using a  $\text{Mg K}\alpha$  radiation excited source with a constant power of 100 W (15 kV and 6.67 mA). The morphology of the samples was studied by a scanning electron microscope of FEI QUANTA 250 FEG. Ionic conductivities were measured by using a DDS-307A conductivity meter (LEICI, Shanghai INESA Co.) in a glovebox (MBRAUN,  $\text{H}_2\text{O} \leq 0.1 \text{ ppm}$ ,  $\text{O}_2 \leq 0.1 \text{ ppm}$ ).

Tab. S1 Li diffusion coefficient in different alloys.

| Alloy               | Li diffusion coefficient (cm <sup>2</sup> s <sup>-1</sup> ) | Reference |
|---------------------|-------------------------------------------------------------|-----------|
| Li (self-diffusion) | $5.7 \times 10^{-11}$                                       | [1]       |
| Li-Zn alloy         | $4.0 \times 10^{-7}$                                        | [2]       |
| Li-Ag alloy         | $2.4 \times 10^{-9}$                                        | [3]       |
| Li-Al alloy         | $6.0 \times 10^{-10}$                                       | [4]       |
| Li-Mg alloy         | $2.5 \times 10^{-8}$                                        | [5]       |

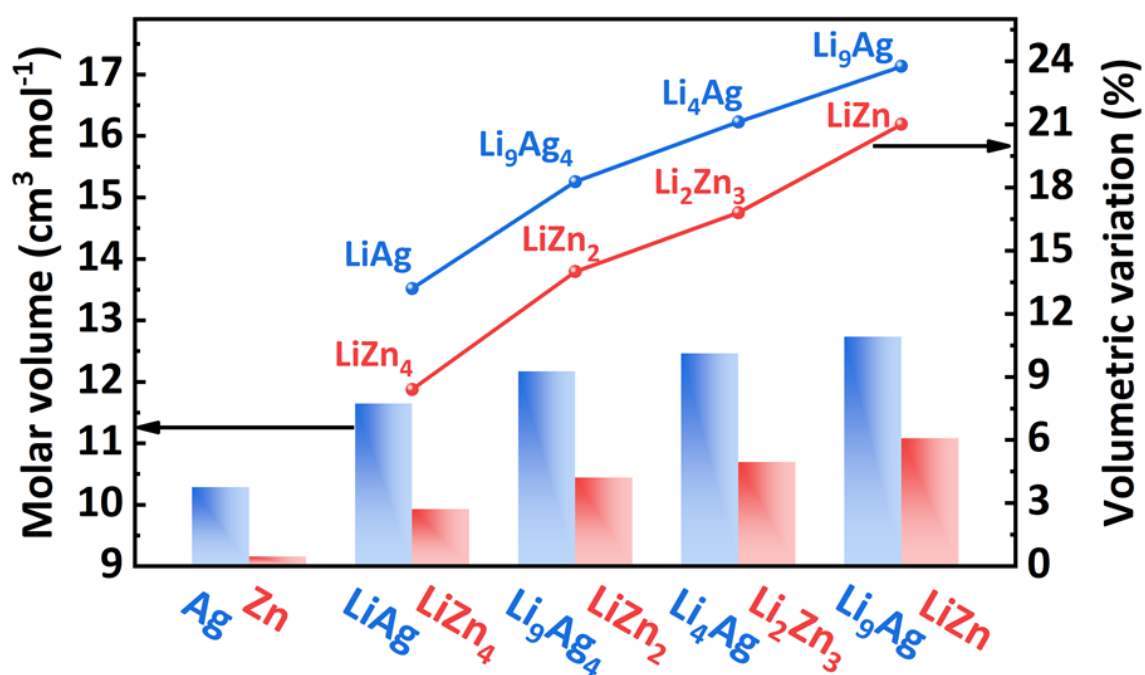

Fig. S1 Comparison of molar volume and volumetric variation of different Li-Ag and Li-Zn alloys.

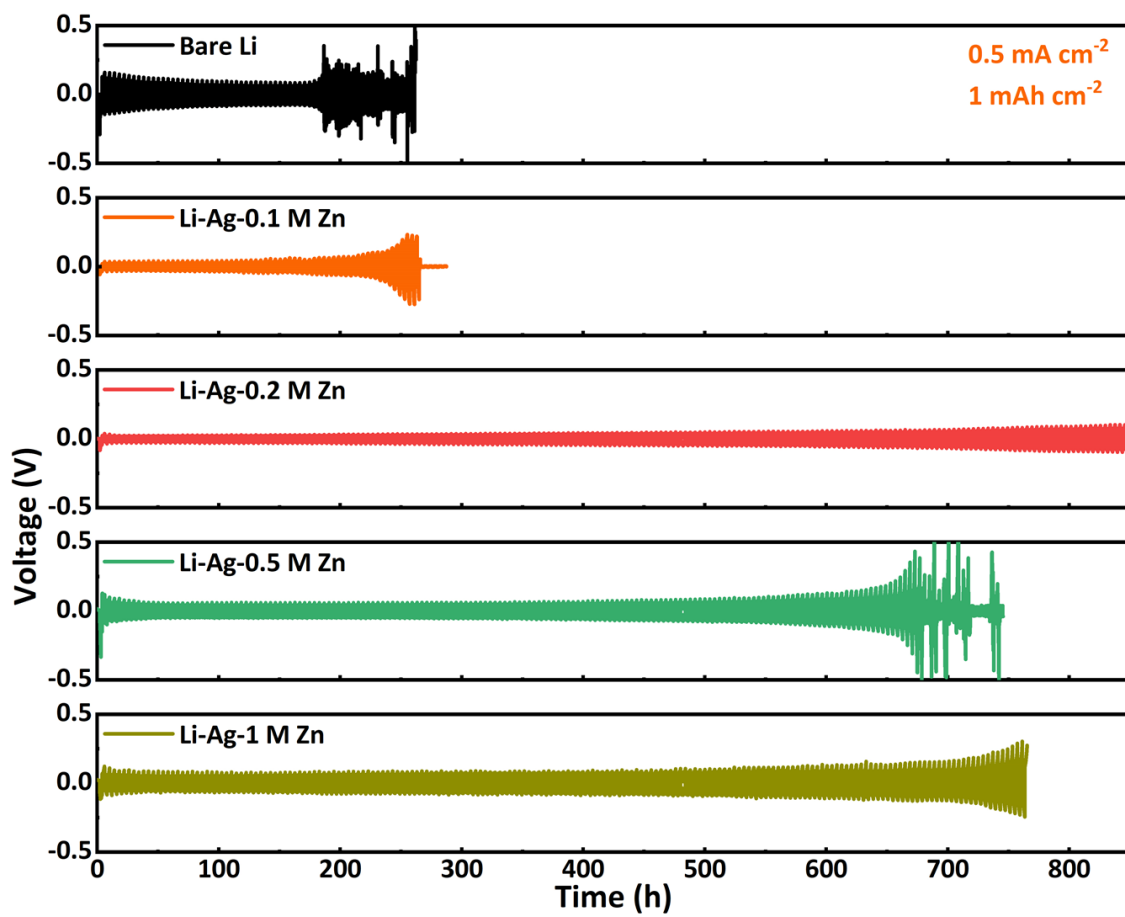

Fig. S2 Time-voltage profiles of symmetric cells using bare Li or Li-Ag-Zn electrodes under  $0.5 \text{ mA cm}^{-2}$  and  $1 \text{ mAh cm}^{-2}$ . Herein, the impact of  $\text{Zn}(\text{TFSI})_2$  amount in the electrolyte on the performances of Li-Ag-Zn electrodes is investigated systematically, where the sample notation of Li-Ag- $x \text{ M Zn}$  depicts  $x \text{ M Zn}(\text{TFSI})_2$  added in the baseline electrolyte to form the Li-Ag-Zn electrodes upon cycling.

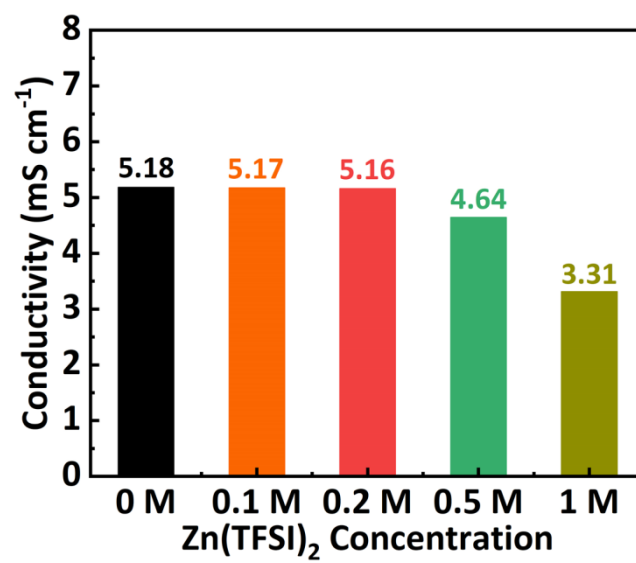

Fig. S3 Ionic conductivities of the baseline electrolyte with various Zn(TFSI)<sub>2</sub> concentrations.

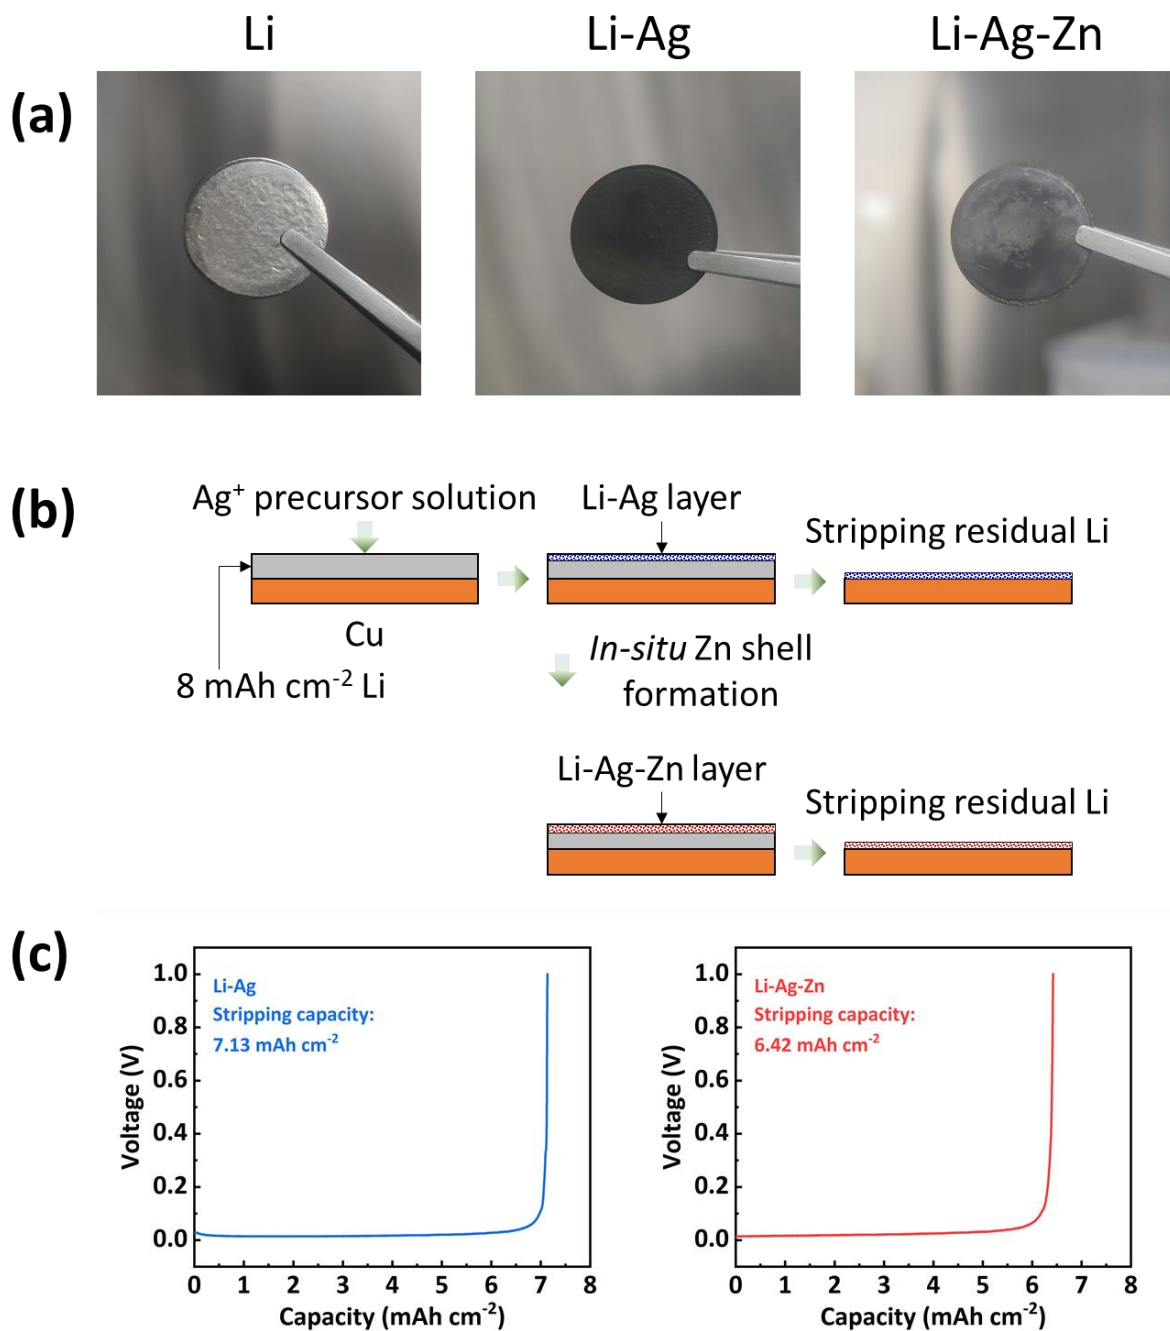

Fig. S4 (a) Photograph of Li, Li-Ag and Li-Ag-Zn. (b) Experimental process to determine the reacted Li amount during the surface modification. Briefly, an amount of 8 mAh cm<sup>-2</sup> Li was electroplated on a Cu foil, on which the Ag<sup>+</sup> precursor solution was dropped to form the Li-Ag layer. The Li-Ag layer coated electrode was then subjected to Li stripping process up to 1 V versus Li/Li<sup>+</sup> to remove the residual Li, and the reacted Li amount during the Li-Ag



surface modification can be estimated by the difference between the stripping and initial capacities. The reacted Li amount during the Li-Ag-Zn surface modification can be estimated by the same way, except an additional process of the *in-situ* Zn shell formation (using the baseline electrolyte with 0.2 M Zn(TFSI)<sub>2</sub> and cycling under 0.5 mA cm<sup>-2</sup> – 1 mAh cm<sup>-2</sup> for 5 cycles prior to the Li stripping process). (c) Voltage profile of the Li stripping process of the Li-Ag or Li-Ag-Zn layer coated electrodes.

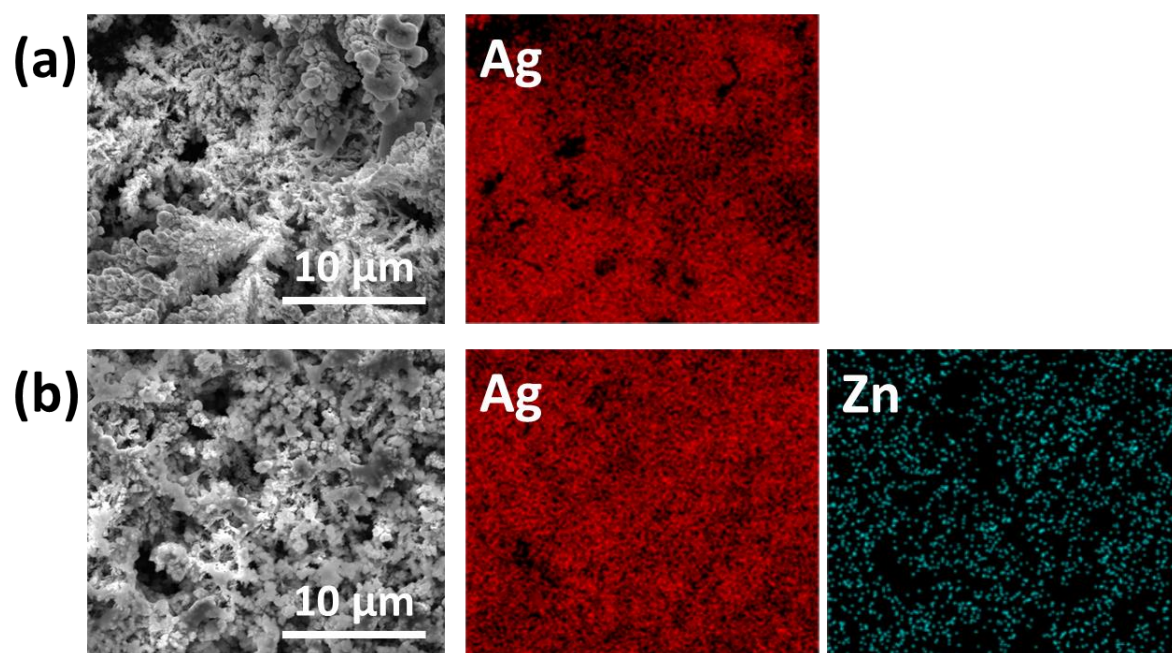

Fig. S5 SEM and EDS images of (a) Li-Ag and (b) Li-Ag-Zn electrodes.

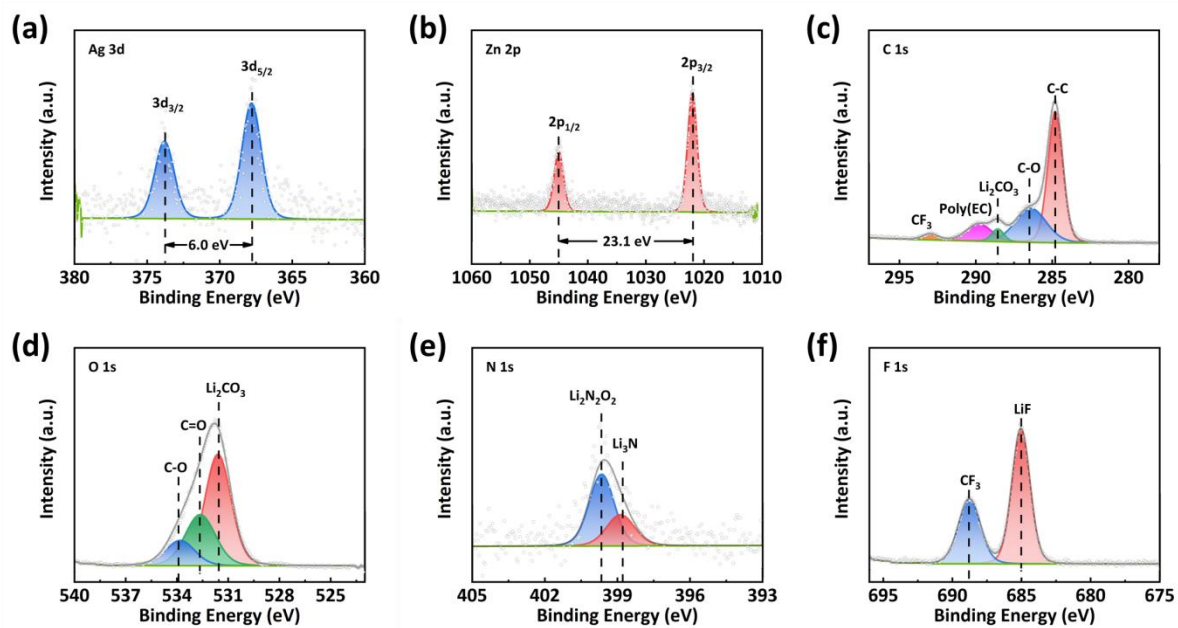

Fig. S6 (a) Ag 3d, (b) Zn 2p, (c) C 1s, (d) O 1s, (e) N 1s and (f) F 1s XPS spectra of Li-Ag-Zn electrode.

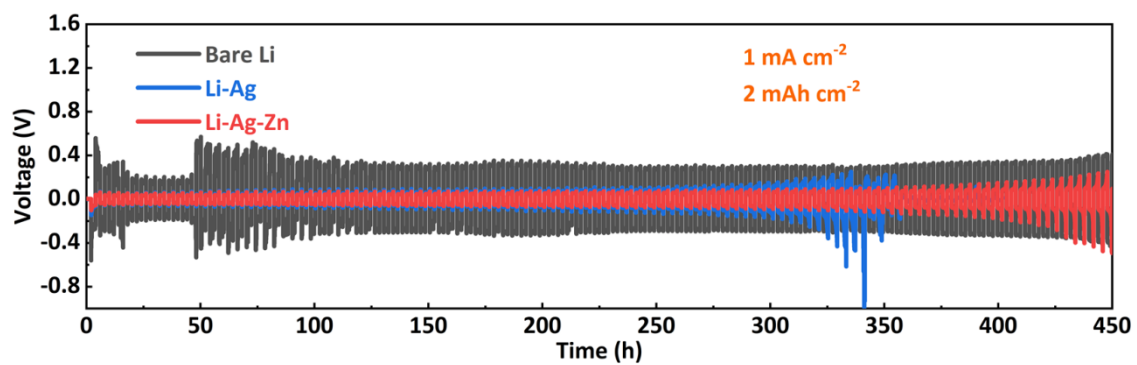

Fig. S7 Cycling performances of symmetric cells using Li, Li-Ag or Li-Ag-Zn electrodes under 1 mA cm<sup>-2</sup> and 2 mAh cm<sup>-2</sup>.

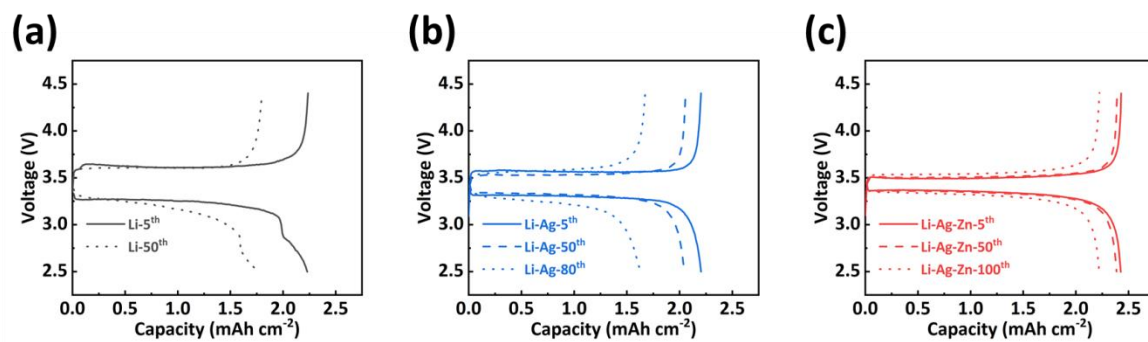

Fig. S8 Charge/discharge curves of Li || LiFePO<sub>4</sub> full cells using (a) Li, (b) Li-Ag or (c) Li-Ag-Zn electrodes.

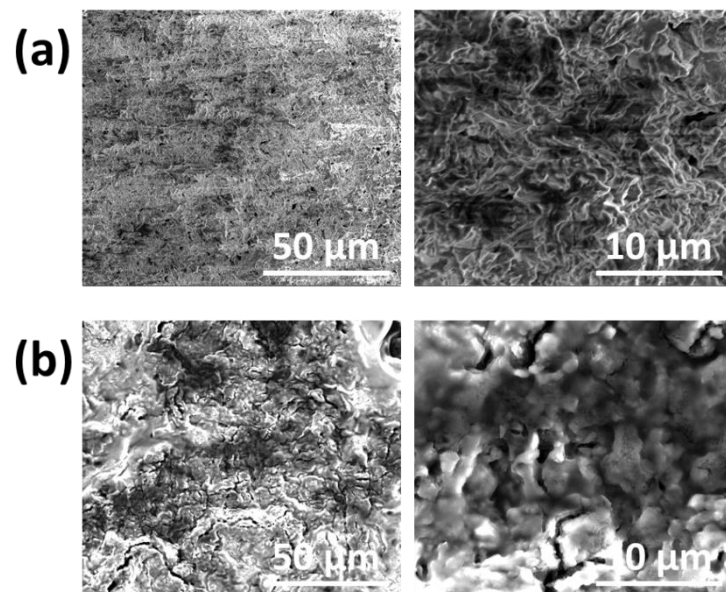

Fig. S9 SEM images of the cycled Li electrodes disassembled from the Li || LiFePO<sub>4</sub> full cells after (a) 5 and (b) 50 cycles.

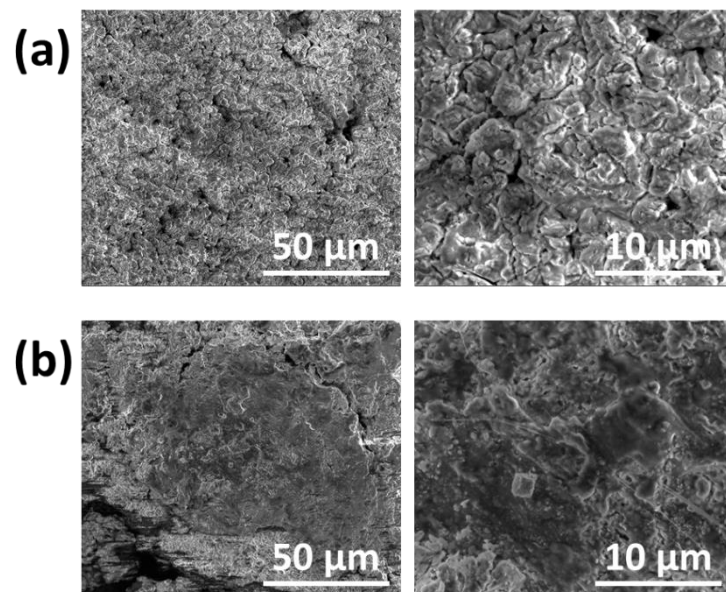

Fig. S10 SEM images of the cycled Li-Ag electrodes disassembled from the  $\text{Li} \parallel \text{LiFePO}_4$  full cells after (a) 5 and (b) 50 cycles.

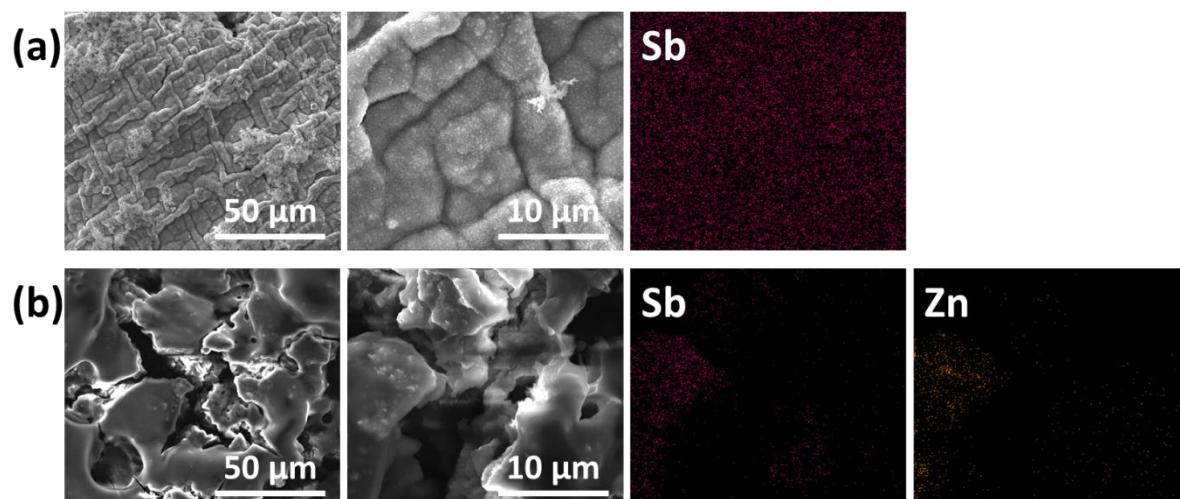

Fig. S11 SEM and EDS images of (a) Li-Sb and (b) Li-Sb-Zn electrodes.

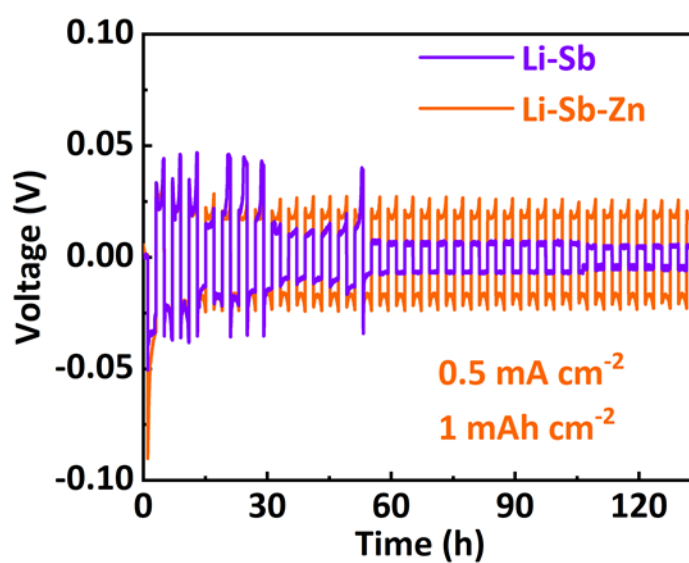

Fig. S12 Cycling performances of symmetric cells using Li-Sb or Li-Sb-Zn electrodes under  $0.5 \text{ mA cm}^{-2}$  and  $1 \text{ mAh cm}^{-2}$ .



## References

1. E. Dologlou, *Glass Phys. Chem.*, 2010, **36**, 570-574.
2. A. Hu, W. Chen, X. Du, Y. Hu, T. Lei, H. Wang, L. Xue, Y. Li, H. Sun, Y. Yan, J. Long, C. Shu, J. Zhu, B. Li, X. Wang and J. Xiong, *Energy Environ. Sci.*, 2021, **14**, 4115-4124.
3. S. Jin, Y. Ye, Y. Niu, Y. Xu, H. Jin, J. Wang, Z. Sun, A. Cao, X. Wu, Y. Luo, H. Ji and L.-J. Wan, *J. Am. Chem. Soc.*, 2020, **142**, 8818-8826.
4. S. Qu, W. Jia, Y. Wang, C. Li, Z. Yao, K. Li, Y. Liu, W. Zou, F. Zhou, Z. Wang and J. Li, *Electrochim. Acta*, 2019, **317**, 120-127.
5. Z. Shi, M. Liu, D. Naik and J. L. Gole, *J. Power Sources*, 2001, **92**, 70-80.
